# Supplementary material for: The efficacy of interactive analogical models in the instruction of bond energy curves in undergraduate chemistry
Source: Royal Society of Chemistry journal article supplement (doi:10.1039/c5rp00194c), 2016-01-01
Supplement: c5rp00194c1.zip [file c5rp00194c1.zip]

CHM311 Study

Pretest

Select the best answer. If you do not know the answer select “I don’t know”

1. Which fact about molecular fluorescence is true:

- a molecule absorbs a photon of light and changes its chemical structure.
- It is a process whereby an electron undergoes an intersystem crossing before emitting a photon of longer wavelength
- It is a process by which a molecule in its ground state absorbs a photon of light and releases that energy by radiating a photon of light.
- I don’t know

1. Besides releasing energy by radiating a photon, how can a molecule lose energy from its excited state? (select all that apply)

- Reacts and changes its chemical structure
- Loses energy through collisional quenching
- Remains in its excited state indefinitely
- Enters forbidden spin state before releasing a photon
- I don’t know

1. Electronic excitation of molecules by absorption of radiation occurs on the order of:

- 1ps
- 10ns
- 1fs
- I don’t know

1. Internal conversion refers to what process?

- The transition from an allowed spin-state to a forbidden one
- A non-radiative electronic relaxation from a low vibrational level of an excited electron state to high vibrational lower level of a lower electronic state
- The association of a fluorophore with a quencher molecule, which dampens fluorescence.
- An intramolecular cyclization that occurs due to the promotion of an electron with no observed fluorescence
- I don’t know

CHM311 Study

Posttest

Select the best answer. If you do not know the answer select “I don’t know”

1. Which fact about molecular fluorescence is true:

- It is a process by which a molecule absorbs a photon of light and changes its chemical structure.
- It is a process by which a molecule in its ground state absorbs a photon of light and releases that energy by radiating a photon of light.
- It is a process process by which a molecule absorbs a photon of light and emits a photon of shorter wavelength.
- It is a process whereby an electron undergoes an intersystem crossing before emitting a photon of longer wavelength
- I don’t know

1. Select the three general types of quenching processes? (select all that apply)

- Perrin Quenching
- Collisional Quenching
- Spontaneous Quenching
- Pre-association Quenching
- I don’t know

1. Molecular vibrations occur on the time scale of:

- 0.1 – 1 fs
- 100 - 1000 ns
- 1 – 10 ps
- 10 - 100 fs
- I don’t know

1. Generally, electronic excitation occurs between?

- The LUMO of the excited state and the HOMO of the ground state
- The HOMO of the excited state and the LUMO of the ground state
- I don’t know
